# Supplementary material
Source: Springer Nature journal article supplement (https://www.springermedizin.de/resource/supplementary/12893_2011_210_MOESM4_ESM.pdf/9511828)

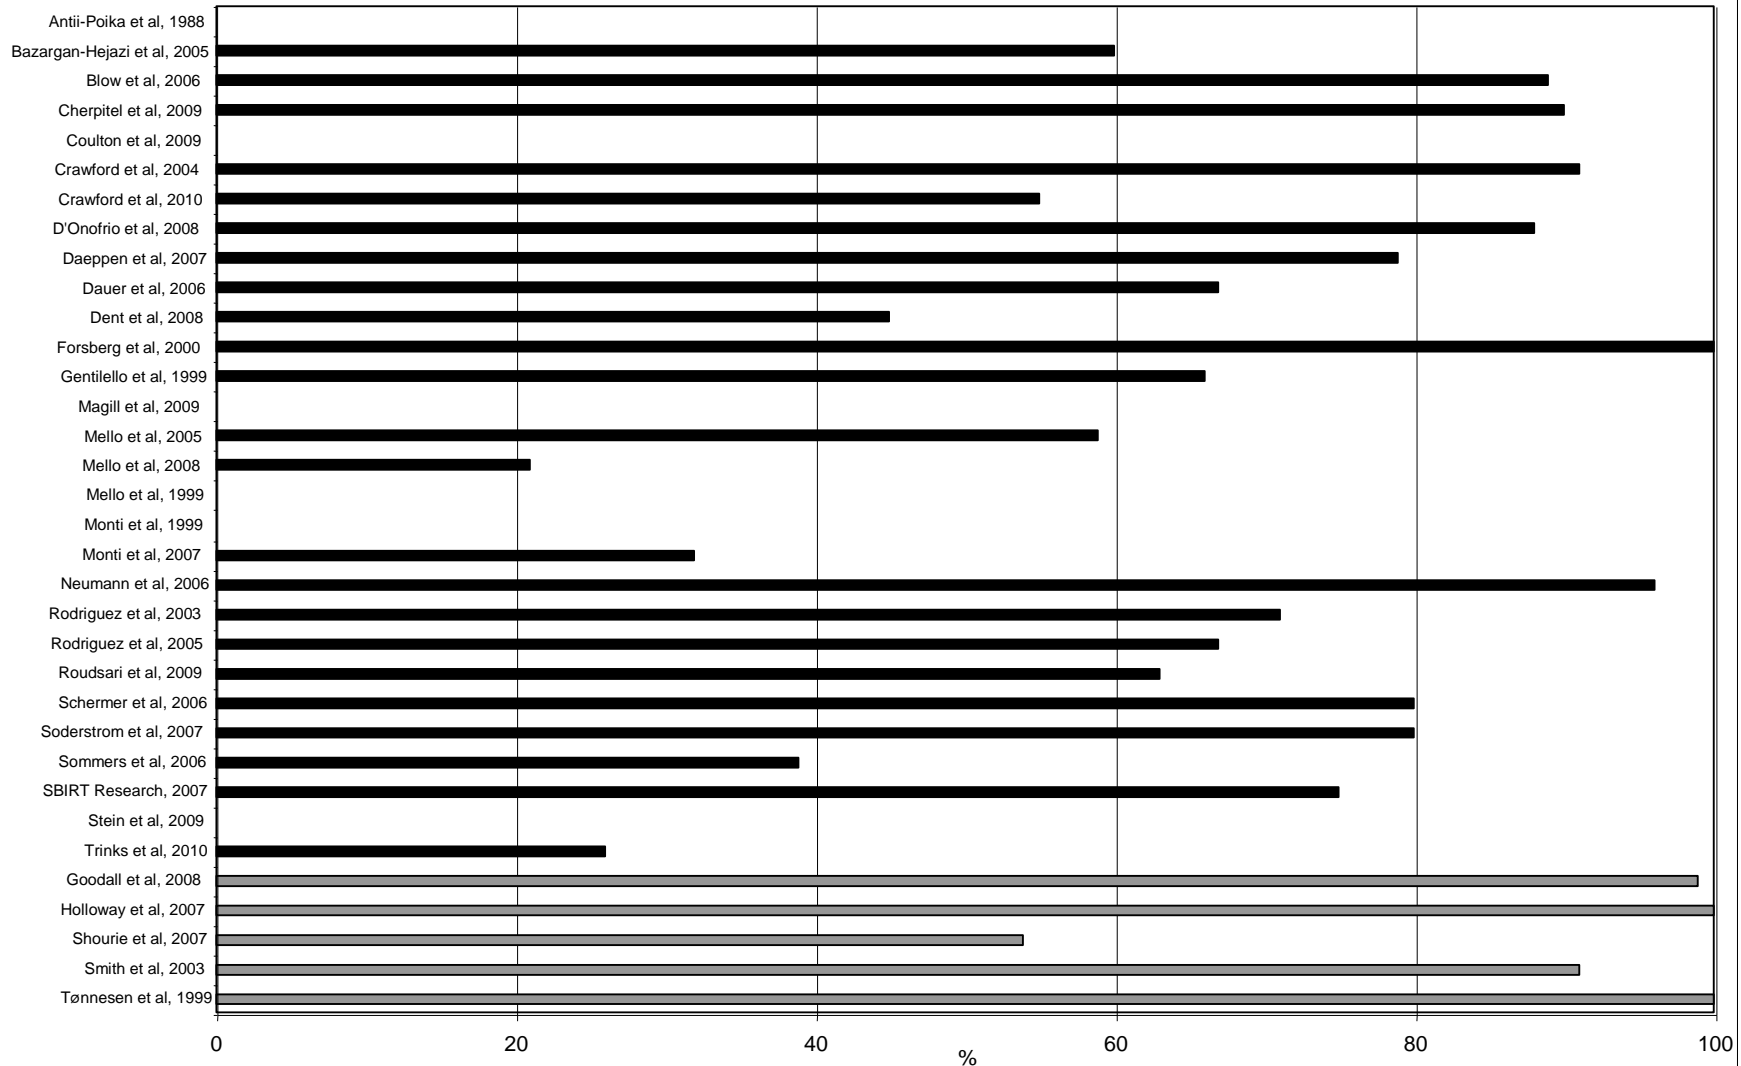

Supplement: MOESM4 [file 9511828]
